# Supplementary material for: Metallically gradated silicon nanowire and palladium nanoparticle composites as robust hydrogenation catalysts
Source: PubMed Central journal article supplement (PMC9814402; doi:10.1038/s42004-020-0332-z), 2020-06-26
Supplement: 42004_2020_332_MOESM2_ESM.pdf [file 42004_2020_332_MOESM2_ESM.pdf]

## Description of Additional Supplementary Files

File Name: Supplementary Data 1

Description: Crystallographic information file for compound **1b**

File Name: Supplementary Data 2

Description: Crystallographic information file for compound **2b**
